# Supplementary material for: Singlet oxygen initiates a plastid signal controlling photosynthetic gene expression
Source: PubMed Central journal article supplement (PMC5244666; doi:10.1111/nph.14223), 2016-10-13
Supplement: NPH-213-1168-s002.pdf [file NPH-213-1168-s002.pdf]

**Supporting Information Table S1** List of genes referred to in this manuscript, with real-time PCR primer sequences given (where used)

| Gene Name                           | AGI       | Sense Primer (5' -> 3')  | Antisense Primer (5' -> 3') |
|-------------------------------------|-----------|--------------------------|-----------------------------|
| <i>18S</i>                          | At3g41768 | GTTGCTTATAGGACTCCGCTG    | CCTTACTATGTCTGGACCTGGT      |
| <i>PSAD1</i>                        | At4g02770 | GTCTCCGATCTTCGCTGGAAG    | CTTGGATCTAAGCCTTGTC         |
| <i>PSAD2</i>                        | At1g03130 | GAAGCTCCAGTTGGATTCACTC   | CCGATGGATCTCATGTTTAGTCC     |
| <i>FNR2</i>                         | At1g20020 | GGCGACTACCATGAATGCTG     | CAGGAGCATCATCAGCTGTG        |
| <i>PSBQ2</i>                        | At4g05180 | GCTCAGCAGAACGTGTGAC      | GTAACGGAGGTACGATGCTC        |
| <i>ATPD</i>                         | At4g09650 | GCTACGCGATGGCATTAGCAG    | CTCCTTAAACGATCTCCGTACAG     |
| <i>LHCB4.2</i>                      | At3g08940 | GAGCTGATTCACGGTCGGTG     | GGTCAGACGCTAGTCTTAACG       |
| <i>ELIP2</i>                        | At4g14690 | CAAGAGGATTGCTCCGGTAG     | GAACCATCGATGCCAACGTC        |
| <i>ACTIN2</i>                       | At3g18780 | GGTAACATTGTGCTCAGTGGTGG  | CTCGGCCTTGGAGATCCATC        |
| <i>Pyruvate kinase-like protein</i> | At3g49160 | CCGTTCTTCGACAAGAGTTGA    | CATCACACAGCTCGCCCT          |
| <i>HSP20-like protein</i>           | At4g21870 | CATGTTCTGTTGGTCTCAGTCT   | GCAGCTCTAGCAAGAAGTTGA       |
| <i>GST1</i>                         | At1g02930 | GAGCCTTTCATCCTTCGCAA     | GTGAAGTGGTCAGAAGCCAA        |
| <i>Nodulin-like protein</i>         | At5g64870 | GGTGAAGACTGAAGTCAAAGTGT  | CTGCGCCTAAGAGGGTCT          |
| <i>L19 ribosomal protein</i>        | At4g02230 | CATCATCAGGAAGCCAACGA     | CTAGCCTTCTCAGCCTTGGA        |
| <i>BAP1</i>                         | At3g61190 | GGAGATTGATTTGAGATCAGCA   | CTCGGCCTCCACAAACCA          |
| <i>FER1</i>                         | At5g01600 | CAACGTCCTCTATGTGTACCAT   | CATCTGGTCGAAATGCCAA         |
| <i>HEMA1</i>                        | At1g58290 | CAAGAACTCTGCAGCTGATC     | CCATTCAGCTTCAGGTATAGC       |
| <i>GSA2</i>                         | At3g48730 | CTTCGTCGTCACCCGT         | CAATGTATTCAATTCATCAATGTCT   |
| <i>LHCB2.1</i>                      | At2g05100 | CTCCGCAAGGTTGGTGATC      | CGGTTAGGTAGGACGGTGATT       |
| <i>GUN4</i>                         | At3g59400 | CTCCATTGCCAATCTCAC       | CCGAATCTACCATCACTGTG        |
| <i>ADF2</i>                         | At3g46000 | CGATTTTCGACTTTGTCACTGC   | TCATCTTGTCTCTCACTTTGGC      |
| <i>YLS8</i>                         | At5g08290 | GCTGAAATATCCCCTGAACTG    | AATGGAGAACAACCGAAACAG       |
| <i>EX1</i>                          | At4g33630 | CTACTGCTACTAATGATGCTGTTG | GACATCTCCGAAATACCAGAC       |
| <i>EX2</i>                          | At1g27510 | CGTTGGAACCGTCACTTCTC     | CAGCGACAGCATCATCAACA        |
| <i>FLU</i>                          | At3g14110 | GTGACAAGTCTCGAGCTCCAG    | CAAGAGGTGTAGCCATCTGAAG      |
| <i>CHLI1</i>                        | At4g18480 | CGGTTATGAATGTAGCCACTG    | CTTGCCCTACTATAGCTGC         |
| <i>CHLI2</i>                        | At5g45930 | CCCATCTCTGCTTCGGACCAG    | CTCCATTATCATCACACCACC       |
| <i>CHLH/GUN5</i>                    | At5g13630 | CTGGTCGTGACCCCTAGAACAG   | GATTGCCAGCTTCTTCTCTG        |
| <i>CHLD</i>                         | At1g08520 | CAGAATTGCCTCGTCCGCTTC    | CATCTGGACAAGCTGGGTGAG       |
| <i>PORB</i>                         | At4g27440 | GGTGCCTCCATTACCGAC       | CACGTTCCATTTCCCTGTC         |
| <i>PORC</i>                         | At1g03630 | CCACCCTGTTGACCATCAAG     | CAGATCTCGCTGCCTTCTCG        |
| <i>CAO</i>                          | At1g44446 | CTTGGATTGGCGTGCTCG       | CGGAACCGGACCAGAAACATTC      |
| <i>FC2</i>                          | At2g30390 | GCTACTTCATCAAACCGGCTTC   | GCATCAGTTATGTGGCGAA         |
| <i>HO1/GUN2</i>                     | At2g26670 | GGTTTGTGGCTATGAGACTTCAT  | CTGGAATCTCGTAACCTTGT        |
| <i>ERF5</i>                         | At5g47230 |                          |                             |
| <i>ERF6</i>                         | At4g17490 |                          |                             |
| <i>WRKY33</i>                       | At2g38470 |                          |                             |
| <i>WRKY40</i>                       | At1g80840 |                          |                             |
| <i>LHCB1.2</i>                      | At1g29910 |                          |                             |
| <i>HY2/GUN3</i>                     | At3g09150 |                          |                             |
| <i>FC1</i>                          | At5g26030 |                          |                             |
| <i>GLK2</i>                         | At5g44190 |                          |                             |
| <i>HEMA2</i>                        | At1g09940 |                          |                             |
| <i>PPO2</i>                         | At5g14220 |                          |                             |
| <i>PETE1</i>                        | At1g76100 |                          |                             |
| <i>MBS1</i>                         | At3g02790 |                          |                             |
