# Supplementary material for: Singlet oxygen initiates a plastid signal controlling photosynthetic gene expression
Source: PubMed Central journal article supplement (PMC5244666; doi:10.1111/nph.14223), 2016-10-13
Supplement: NPH-213-1168-s006.pdf [file NPH-213-1168-s006.pdf]

**Supporting Information Table S5** *gun1gun5* rescue of genes differentially expressed in WT

| Gene Set                       | Number of Genes | Number of Genes Rescued at least 1.5-fold in <i>gun1,5</i> (%) |
|--------------------------------|-----------------|----------------------------------------------------------------|
| <b>FR Inhibited</b>            | <b>442</b>      | <b>154 (34.8%)</b>                                             |
| Plastid Localised <sup>a</sup> | 15              | 7 (46.7%) <sup>b</sup> (4.5%) <sup>c</sup>                     |
| <b>FR Induced</b>              | <b>263</b>      | <b>192 (73.0%)</b>                                             |
| Plastid Localised <sup>a</sup> | 10              | 8 (80.0%) <sup>b</sup> (4.2%) <sup>c</sup>                     |
| <b>NF Inhibited</b>            | <b>761</b>      | <b>326 (42.8%)</b>                                             |
| Plastid Localised <sup>a</sup> | 260             | 167 (64.2%) <sup>b</sup> (51.2%) <sup>c</sup>                  |
| <b>NF Induced</b>              | <b>367</b>      | <b>43 (11.7%)</b>                                              |
| Plastid Localised <sup>a</sup> | 26              | 3 (11.5%) <sup>b</sup> (7.0%) <sup>c</sup>                     |
| <b>NF &amp; FR Inhibited</b>   | <b>63</b>       | <b>10 (15.9%)</b>                                              |
| <b>NF &amp; FR Induced</b>     | <b>37</b>       | <b>1 (2.7%)</b>                                                |

<sup>a</sup>Localisation predictions taken from the TAIR database ([www.arabidopsis.org](http://www.arabidopsis.org)).

<sup>b</sup>Percentage of plastid-localised genes in each set that are rescued in the *gun1gun5* double mutant.

<sup>c</sup>Percentage of genes rescued in the *gun1gun5* double mutant in each set that are plastid-localised.
