# Supplementary material for: Singlet oxygen initiates a plastid signal controlling photosynthetic gene expression
Source: PubMed Central journal article supplement (PMC5244666; doi:10.1111/nph.14223), 2016-10-13
Supplement: NPH-213-1168-s007.pdf [file NPH-213-1168-s007.pdf]

**Supporting Information Table S6** Predicted localisation of protein products of differentially expressed genes identified through microarray analysis of FR and NF treated WT seedlings

| Gene set          | Total number of genes | Plastid localisation (%) | Mitochondrion localisation (%) | Secretory pathway localisation (%) | Other (%)   |
|-------------------|-----------------------|--------------------------|--------------------------------|------------------------------------|-------------|
| FR Inhibited      | 442                   | 15 (3.4%)                | 2 (0.5%)                       | 173 (39.1%)                        | 252 (57.0%) |
| FR Induced        | 263                   | 10 (3.8%)                | 2 (0.8%)                       | 57 (21.7%)                         | 194 (73.7%) |
| NF Inhibited      | 761                   | 260 (34.2%)              | 5 (0.7%)                       | 109 (14.3%)                        | 387 (50.8%) |
| NF Induced        | 367                   | 26 (7.1%)                | 10 (2.7%)                      | 55 (15.0%)                         | 276 (75.2%) |
| FR & NF Inhibited | 63                    | 6 (9.5%)                 | 0 (0.0%)                       | 21 (33.3%)                         | 36 (57.2%)  |
| FR & NF Induced   | 37                    | 1 (2.7%)                 | 0 (0.0%)                       | 5 (13.5%)                          | 31 (83.8%)  |

Localisation was determined using the TAIR database ([www.arabidopsis.org](http://www.arabidopsis.org)).
